# Supplementary material
Source: PubMed Central journal article supplement (PMC1074753)

## Supplementary Material.

Figure S1. The figure contains the imino proton NMR spectra of d(TTAGGGTTAGGG) and that of d(GGGTTAGGGTTA) obtained at 298 K. For each DNA the spectrum obtained with the DNA in the presence of 5 mM sodium is shown as well as the spectrum obtained with the DNA in the presence of 100 mM potassium. The samples were annealed under these conditions.

Figure S2. The figure contains the CD spectra of d(GGGTTTGGG) and d(GGGTTAGGG). The spectra were obtained under the conditions described in the text.

Figure S1.

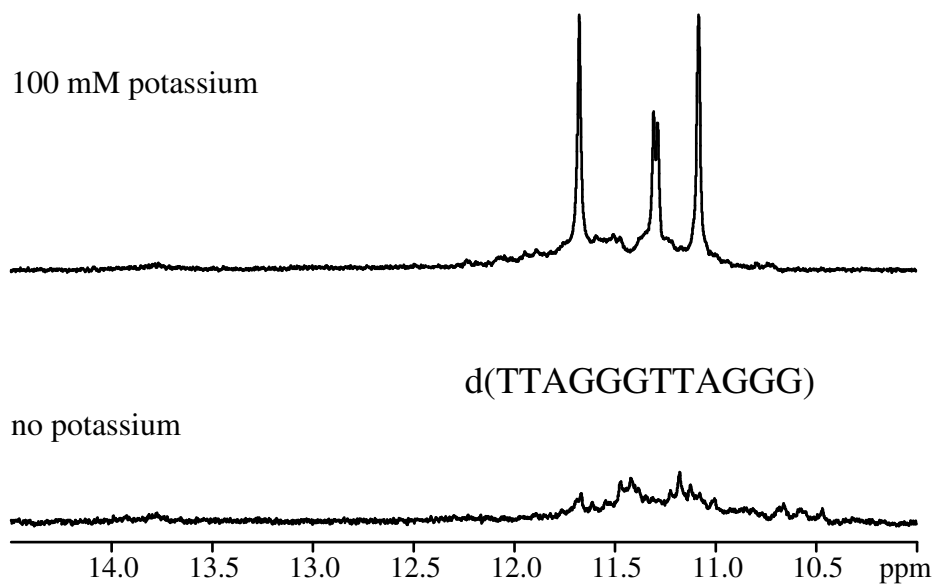

100 mM potassium

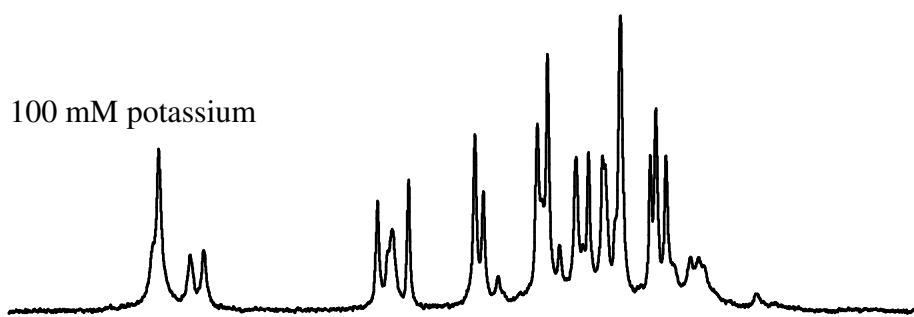

d(GGGTTAGGGTTA)

no potassium

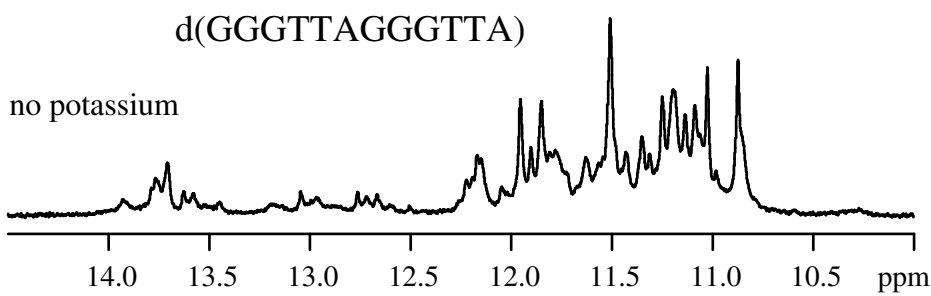

14.0 13.5 13.0 12.5 12.0 11.5 11.0 10.5 ppm

Figure S2.

d(GGGTTAGGG)

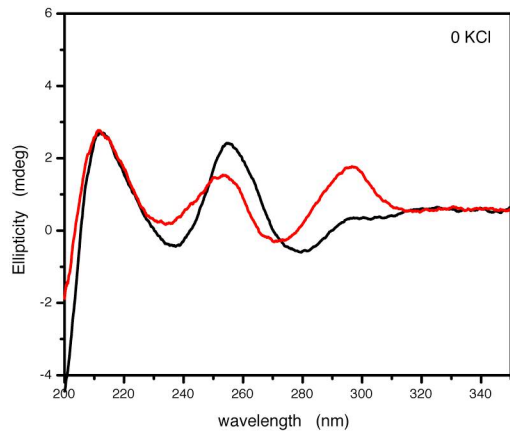

d(GGGTTTGGG)

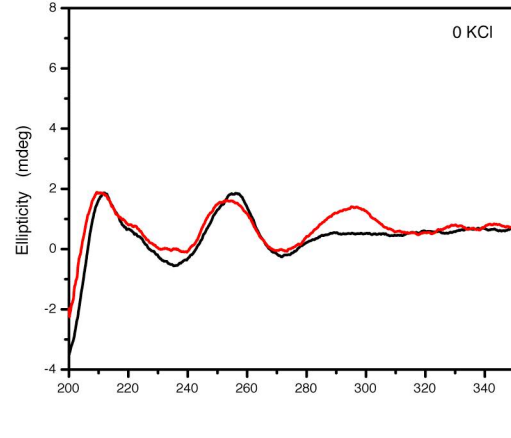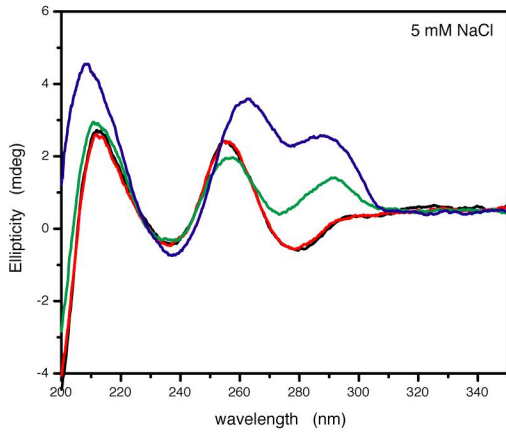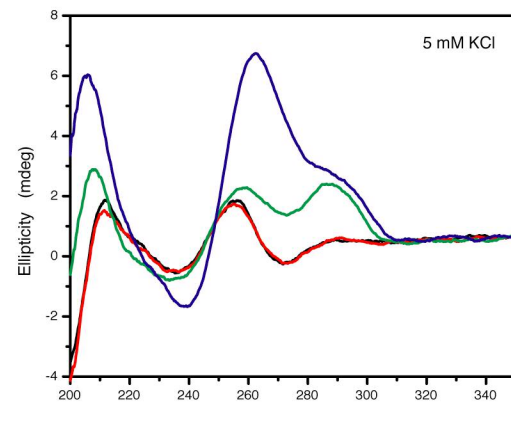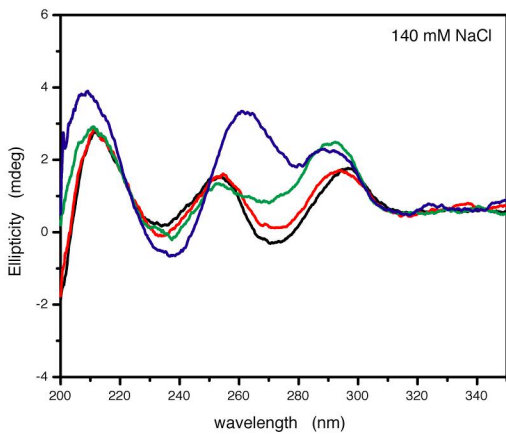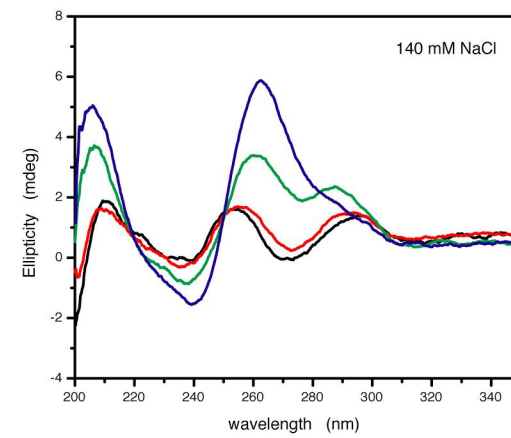

Supplement: nar_33_6_2022__1.pdf [file nar_33_6_2022__1.pdf]
